# Supplementary material for: Loxapine in the Treatment of Manic and Psychotic Symptoms in an Individual Intolerant to Multiple Mood-Stabilizing and Antipsychotic Medications
Source: Hindawi journal article supplement (doi:10.1155/2023/8887553), 2023-06-10
Supplement: f1 [file 8887553.f1.pdf]

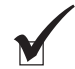

| Topic                       | Item | Checklist item description                                                                             | Reported on Line                                                    |
|-----------------------------|------|--------------------------------------------------------------------------------------------------------|---------------------------------------------------------------------|
| Title                       | 1    | The diagnosis or intervention of primary focus followed by the words “case report”                     | 4,5                                                                 |
| Key Words                   | 2    | 2 to 5 key words that identify diagnoses or interventions in this case report, including "case report" | 67                                                                  |
| Abstract<br>(no references) | 3a   | Introduction: What is unique about this case and what does it add to the scientific literature?        | 95-98                                                               |
|                             | 3b   | Main symptoms and/or important clinical findings                                                       | 107-109; 160-166                                                    |
|                             | 3c   | The main diagnoses, therapeutic interventions, and outcomes                                            | 164-165; 169-175; 186; 188-189; 200-201; 221-226; 229-234           |
|                             | 3d   | Conclusion—What is the main “take-away” lesson(s) from this case?                                      | 352-359                                                             |
| Introduction                | 4    | One or two paragraphs summarizing why this case is unique ( <b>may include references</b> )            | 95-98                                                               |
| Patient Information         | 5a   | De-identified patient specific information.                                                            | 99-101                                                              |
|                             | 5b   | Primary concerns and symptoms of the patient.                                                          | 106-108                                                             |
|                             | 5c   | Medical, family, and psycho-social history including relevant genetic information                      | 137-153                                                             |
|                             | 5d   | Relevant past interventions with outcomes                                                              | 124-125                                                             |
| Clinical Findings           | 6    | Describe significant physical examination (PE) and important clinical findings.                        | 155-166                                                             |
| Timeline                    | 7    | Historical and current information from this episode of care organized as a timeline                   | See Figure 1                                                        |
| Diagnostic Assessment       | 8a   | Diagnostic testing (such as PE, laboratory testing, imaging, surveys).                                 | 155-166; 205-206                                                    |
|                             | 8b   | Diagnostic challenges (such as access to testing, financial, or cultural)                              | 283-287                                                             |
|                             | 8c   | Diagnosis (including other diagnoses considered)                                                       | 164-165                                                             |
|                             | 8d   | Prognosis (such as staging in oncology) where applicable                                               | Not Applicable                                                      |
| Therapeutic Intervention    | 9a   | Types of therapeutic intervention (such as pharmacologic, surgical, preventive, self-care)             | 168-174; 186; 188-189; 200-201; 221-226; 229-231                    |
|                             | 9b   | Administration of therapeutic intervention (such as dosage, strength, duration)                        | 169-175; 188-189; 221-226; 229-231                                  |
|                             | 9c   | Changes in therapeutic intervention (with rationale)                                                   | 184-186; 188-189; 200-201; 221-226                                  |
| Follow-up and Outcomes      | 10a  | Clinician and patient-assessed outcomes (if available)                                                 | 236-243                                                             |
|                             | 10b  | Important follow-up diagnostic and other test results                                                  | 231-241                                                             |
|                             | 10c  | Intervention adherence and tolerability (How was this assessed?)                                       | 236-237; 239-241                                                    |
|                             | 10d  | Adverse and unanticipated events                                                                       | 179-185; 194-200; 203-204; 210-213                                  |
| Discussion                  | 11a  | A scientific discussion of the strengths AND limitations associated with this case report              | 329-349                                                             |
|                             | 11b  | Discussion of the relevant medical literature <b>with references</b> .                                 | 73-90; 274-283                                                      |
|                             | 11c  | The scientific rationale for any conclusions (including assessment of possible causes)                 | 84-89; 354-357                                                      |
|                             | 11d  | The primary “take-away” lessons of this case report (without references) in a one paragraph conclusion | 352-359                                                             |
| Patient Perspective         | 12   | The patient should share their perspective in one to two paragraphs on the treatment(s) they received  | (Pt declined)                                                       |
| Informed Consent            | 13   | Did the patient give informed consent? Please provide if requested                                     | Yes <input type="checkbox"/> No <input checked="" type="checkbox"/> |

(Potentially identifying information has been omitted from this report to preserve patient anonymity.)
